# Supplementary material for: Gut to lung translocation and antibiotic mediated selection shape the dynamics of Pseudomonas aeruginosa in an ICU patient
Source: PubMed Central journal article supplement (PMC9681761; doi:10.1038/s41467-022-34101-2), 2022-11-22
Supplement: 41467_2022_34101_MOESM1_ESM.pdf [file 41467_2022_34101_MOESM1_ESM.pdf]

Supplementary Information for:

**Gut to lung translocation and antibiotic mediated selection shape the dynamics of *Pseudomonas aeruginosa* in an ICU patient**

Rachel M. Wheatley\*<sup>1</sup>, Julio Diaz Caballero\*<sup>1</sup>, Thomas E. van der Schalk<sup>2,8</sup>, Fien HR De Winter<sup>3</sup>, Liam P. Shaw<sup>1</sup>, Natalia Kapel<sup>1</sup>, Claudia Recanatini<sup>4</sup>, Leen Timbermont<sup>2</sup>, Jan Kluytmans<sup>4</sup>, Mark Esser<sup>5</sup>, Alicia Lacombe<sup>6</sup>, Cristina Prat-Aymerich<sup>4,6</sup>, Antonio Oliver<sup>7,8</sup>, Samir Kumar-Singh<sup>2,3</sup>, Surbhi Malhotra-Kumar<sup>2,8</sup>, R. Craig MacLean<sup>1\*\*</sup>

These authors contributed equally \*

Corresponding author \*\*: [craig.maclean@biology.ox.ac.uk](mailto:craig.maclean@biology.ox.ac.uk)

### Supplementary Figure 1: Identification of genomic island.

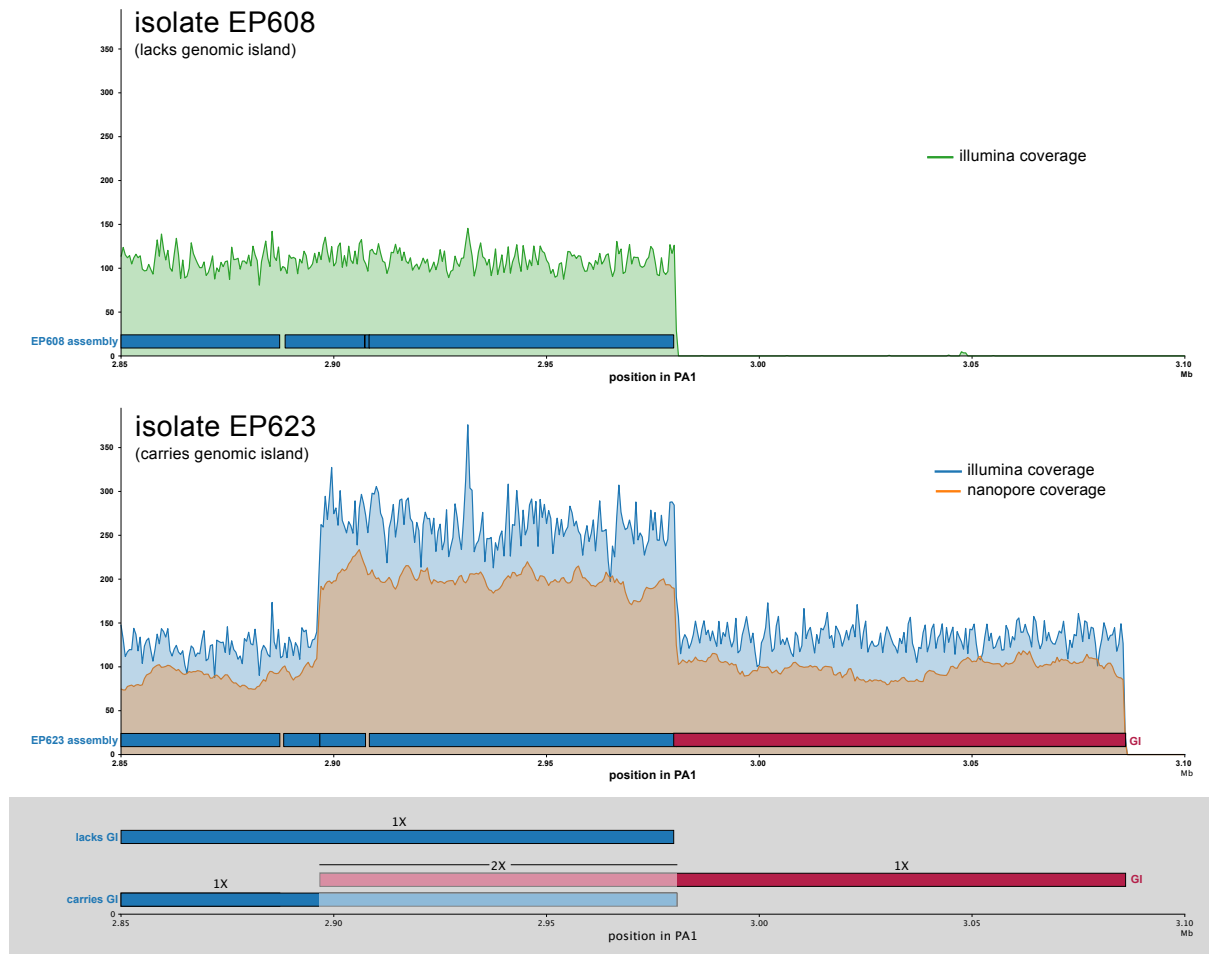

The mapping of Illumina and Oxford Nanopore sequencing data to the reference *P. aeruginosa* PA1 revealed isolates (e.g. EP608) that lacked a genomic region of ~125 kb. In addition, the depth of coverage of the ~75 kb upstream region was 2X greater in isolates carrying the ~125 kb region (e.g. EP623). This information revealed a ~200 kb genomic region, which carried a second copy of the ~75 kb region and additional ~125 kb genetic content.

Supplementary Figure 2: Phylogenetic tree with Bayesian dating of internal nodes.

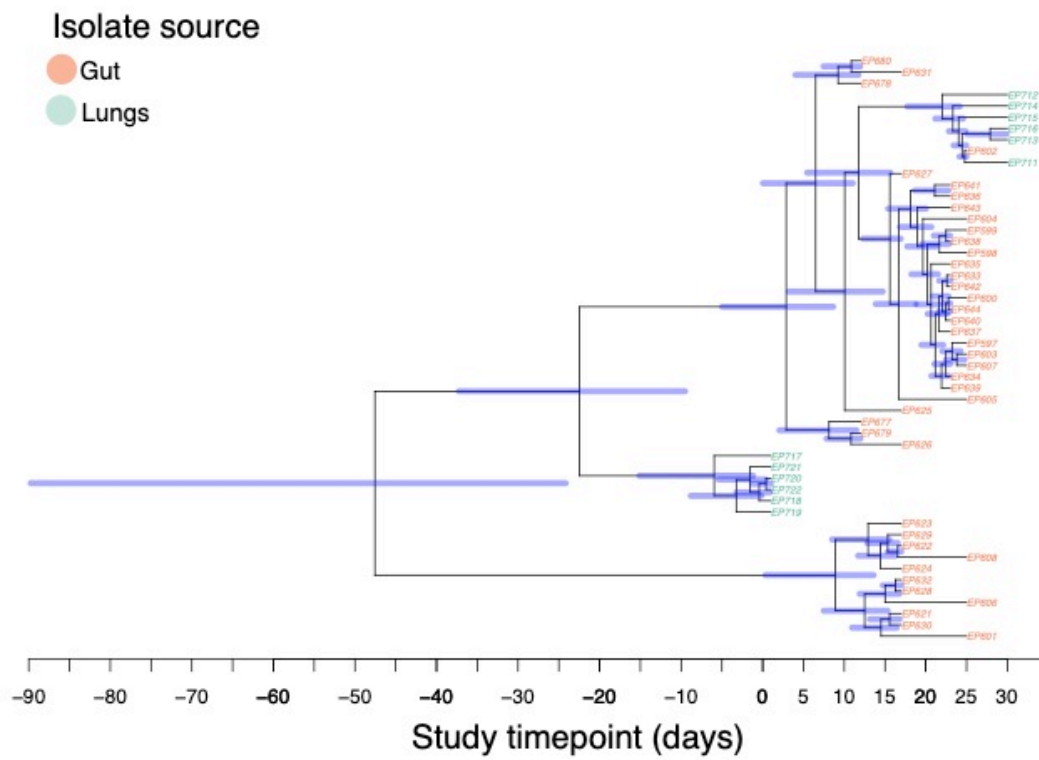

The dated genealogy (as shown in Figure 2F) showing Bayesian dating of internal nodes. Blue bars show 95% CI.

**Supplementary Figure 3:** Correlation between amplicon and isolate sequencing approaches.

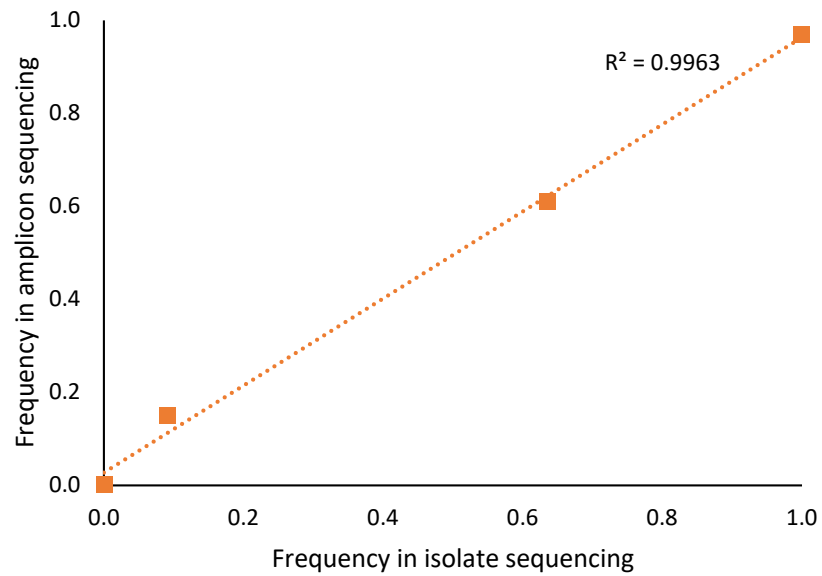

Correlation ( $R^2=0.9963$ ) between the frequency of *oprD* variants measured using isolate sequencing compared to the frequency measured using amplicon sequencing. This plot shows data for the two *oprD* variants from the sampling points for which both isolate and amplicon sequencing was carried out (gut day 23 and gut day 25).

**Supplementary Table 1: Genomic variants.**

| <b>Variant Type</b> | <b>Gene Affected</b>                                      | <b>Mutation</b> | <b>Effect</b>  |
|---------------------|-----------------------------------------------------------|-----------------|----------------|
| SNP                 | hypothetical protein                                      | G174A           | synonymous     |
| SNP                 | guanine deaminase ( <i>guaD</i> )                         | A806T           | non-synonymous |
| SNP                 | methyl-accepting chemotaxis transducer ( <i>tar</i> )     | G392A           | non-synonymous |
| SNP                 | selenocysteine-specific elongation factor ( <i>selB</i> ) | T1246C          | non-synonymous |
| SNP                 | selenocysteine synthase ( <i>selA</i> )                   | G447A           | synonymous     |
| SNP                 | intergenic                                                |                 |                |
| SNP                 | outer membrane porin ( <i>oprD</i> )                      | C222T           | synonymous     |
| SNP                 | intergenic                                                |                 |                |
| SNP                 | anthranilate synthase component I ( <i>trpE</i> )         | G29A            | non-synonymous |
| SNP                 | multidrug resistance operon repressor ( <i>mexR</i> )     | T305C           | non-synonymous |
| SNP                 | hypothetical protein                                      | G1203A          | synonymous     |
| SNP                 | hypothetical protein                                      | C532T           | non-synonymous |
| SNP                 | AlgW protein ( <i>algW</i> )                              | G312A           | synonymous     |
| SNP                 | hypothetical protein                                      | G354A           | synonymous     |
| SNP                 | LysR family transcriptional regulator ( <i>lysR</i> )     | C527A           | non-synonymous |
| SNP                 | dehydrogenase ( <i>betA</i> )                             | G802A           | non-synonymous |
| SNP                 | two-component sensor ( <i>pprA</i> )                      | C2217T          | synonymous     |
| Indel               | intergenic                                                |                 |                |
| indel               | intergenic                                                |                 |                |
| indel               | glutamate--cysteine ligase ( <i>gshA</i> )                | <i>nt1265Δ2</i> | frameshift     |
| indel               | poly(beta-D-mannuronate) lyase ( <i>algL</i> )            | <i>nt495Δ10</i> | frameshift     |
| indel               | outer membrane porin ( <i>oprD</i> )                      | <i>nt559Δ1</i>  | frameshift     |
| indel               | outer membrane porin ( <i>oprD</i> )                      | <i>nt1160Δ1</i> | frameshift     |
| indel               | DszC family monooxygenase ( <i>dszC</i> )                 | <i>nt255Δ2</i>  | frameshift     |

Summary of genomic variants identified within the 52 *P. aeruginosa* isolates collected over the course of the study.

**Supplementary Table 2: Primer table**

| Primer name | Primer use                                                    | Primer Sequence                                                                     | Reference                                                          |
|-------------|---------------------------------------------------------------|-------------------------------------------------------------------------------------|--------------------------------------------------------------------|
| RevUL_oprD  | Universal reverse primer for oprD amplicon sequencing         | GTGACTGGAGTTCAGACGTGTGCTCTTCCGATCTCCATGTCACCGGTACCTACG                              | Adapted from Stahlberg <i>et al.</i> (2016) for use in this study. |
| For1L_oprD  | Barcode specific forwards primer for oprD amplicon sequencing | GGACTCTTTCCCTACACGACGCTCTTCCGATCTCACAAGACACCATGGGAAAGAGTGCCAAGAACTAGCCGTCCTACTGCG   |                                                                    |
| For2L_oprD  | Barcode specific forwards primer for oprD amplicon sequencing | GGACTCTTTCCCTACACGACGCTCTTCCGATCTACAGACGACTACATGGGAAAGAGTGCCAAGAACTAGCCGTCCTACTGCG  |                                                                    |
| For3L_oprD  | Barcode specific forwards primer for oprD amplicon sequencing | GGACTCTTTCCCTACACGACGCTCTTCCGATCTCCTGGTAAGTGGATGGGAAAGAGTGCCAAGAACTAGCCGTCCTACTGCG  |                                                                    |
| For4L_oprD  | Barcode specific forwards primer for oprD amplicon sequencing | GGACTCTTTCCCTACACGACGCTCTTCCGATCTTAGGGAAACACGATGGGAAAGAGTGCCAAGAACTAGCCGTCCTACTGCG  |                                                                    |
| For5L_oprD  | Barcode specific forwards primer for oprD amplicon sequencing | GGACTCTTTCCCTACACGACGCTCTTCCGATCTAAGGTTACACAAATGGGAAAGAGTGCCAAGAACTAGCCGTCCTACTGCG  |                                                                    |
| For6L_oprD  | Barcode specific forwards primer for oprD amplicon sequencing | GGACTCTTTCCCTACACGACGCTCTTCCGATCTGACTACTTTCTGATGGGAAAGAGTGCCAAAGAACTAGCCGTCCTACTGCG |                                                                    |
| For7L_oprD  | Barcode specific forwards primer for oprD amplicon sequencing | GGACTCTTTCCCTACACGACGCTCTTCCGATCTAAGGATTCATTCATGGGAAAGAGTGCCAAAGAACTAGCCGTCCTACTGCG |                                                                    |
| For8L_oprD  | Barcode specific forwards primer for oprD amplicon sequencing | GGACTCTTTCCCTACACGACGCTCTTCCGATCTACGTAAGTGGTATGGGAAAGAGTGCCAAAGAACTAGCCGTCCTACTGCG  |                                                                    |
| For9L_oprD  | Barcode specific forwards primer for oprD amplicon sequencing | GGACTCTTTCCCTACACGACGCTCTTCCGATCTAACCAAGACTCGATGGGAAAGAGTGCCAAGAACTAGCCGTCCTACTGCG  |                                                                    |
| For10L_oprD | Barcode specific forwards primer for oprD amplicon sequencing | GGACTCTTTCCCTACACGACGCTCTTCCGATCTGAGAGGACAAAGATGGGAAAGAGTGCCAAAGAACTAGCCGTCCTACTGCG |                                                                    |
| For11L_oprD | Barcode specific forwards primer for oprD amplicon sequencing | GGACTCTTTCCCTACACGACGCTCTTCCGATCTTCCATTCCCTCCATGGGAAAGAGTGCCAAAGAACTAGCCGTCCTACTGCG |                                                                    |
| For12L_oprD | Barcode specific forwards primer for oprD amplicon sequencing | GGACTCTTTCCCTACACGACGCTCTTCCGATCTTCCGATTCTGCTATGGGAAAGAGTGCCAAAGAACTAGCCGTCCTACTGCG |                                                                    |
| For13L_oprD | Barcode specific forwards primer for oprD amplicon sequencing | GGACTCTTTCCCTACACGACGCTCTTCCGATCTAGAACGACTCCATGGGAAAGAGTGCCAAGAACTAGCCGTCCTACTGCG   |                                                                    |
| For14L_oprD | Barcode specific forwards primer for oprD amplicon sequencing | GGACTCTTTCCCTACACGACGCTCTTCCGATCTAACGAGTCTCTTATGGGAAAGAGTGCCAAAGAACTAGCCGTCCTACTGCG |                                                                    |
| For15L_oprD | Barcode specific forwards primer for oprD amplicon sequencing | GGACTCTTTCCCTACACGACGCTCTTCCGATCTAGGTCTACCTCGATGGGAAAGAGTGCCAAAGAACTAGCCGTCCTACTGCG |                                                                    |
| For16L_oprD | Barcode specific forwards primer for oprD amplicon sequencing | GGACTCTTTCCCTACACGACGCTCTTCCGATCTCGTCAACTGACAATGGGAAAGAGTGCCAAAGAACTAGCCGTCCTACTGCG |                                                                    |

Table of primers used in this study. Adapted from primers published in: Ståhlberg, A., Krzyzanowski, P. M., Jackson, J. B., Egyud, M., Stein, L. & Godfrey, T. E. Simple, multiplexed, PCR-based barcoding of DNA enables sensitive mutation detection in liquid biopsies using sequencing. *Nucleic acids research* **44**, e105-e105 (2016).

**Supplementary Table 3:** Reads recovered from amplicon sequencing experiments.

| Days in Study | Sample | Demultiplexed Reads | Genotyped Reads |
|---------------|--------|---------------------|-----------------|
| 17            | lungs  | 427                 | 138             |
| 20            | lungs  | 554                 | 208             |
| 23            | gut    | 20,673              | 9,081           |
| 25            | lungs  | 37,352              | 13,808          |
| 25            | gut    | 1,699               | 671             |

Reads recovered from nanopore in amplicon sequencing experiments of *oprD*. The total demultiplexed reads and then genotyped reads for each sample are shown.
